# Supplementary material for: Molecular Typing of Listeria monocytogenes IVb Serogroup Isolated from Food and Food Production Environments in Poland
Source: MDPI journal article supplement (doi:10.3390/pathogens10040482), 2021-04-15
Supplement: s1 [file s1]

## Sheet: output
Table S1. Characteristics of L. monocytogenes tested.
No.	BIGSdb id	Place of isolation	Source description	Date of isolation	Deduced_serogroup (PCR-serogroup)	ST (MLST)	Clonal_Complex	Sublineage	Cgmlst_type	Virulence genes
										prfA	plcA	mpl	actA	plcB	LIPI3_llsA	LIPI3_llsB	LIPI3_llsD	LIPI3_llsG	LIPI3_llsH	LIPI3_llsP	LIPI3_llsX	LIPI3_llsY	inlA	inlB	inlC	inlC2	inlD	inlE	inlF	inlG	inlH	inlJ	inlK	inlL	agrA	agrC	ami	aut	bsh	cheA	cheY	dltA	fbpA	fur	gtcA	hpt	lap	lapB	lgt
1	47065	łódzkie	RTE	07.11.2013	IVb (2)	1	CC1	SL1	CT322	1	1	1	1	1	1	1	1	1	1	1	1	1	1	1	1	1	1	1	1	0	1	1	1	0	1	1	0	0	1	1	1	1	1	1	1	1	1	1	1
2	47066	łódzkie	RTE	17.12.2013	IVb (13)	6	CC6	SL6	CT477	1	1	1	1	1	1	1	1	1	1	1	1	1	1	1	1	1	1	1	1	1	1	1	1	0	1	1	0	0	1	1	1	1	1	1	1	1	1	1	1
3	47067	łódzkie	RTE	17.12.2013	IVb (13)	6	CC6	SL6	CT477	1	1	1	1	1	1	1	1	1	1	1	1	1	1	1	1	1	1	1	1	1	1	1	1	0	1	1	0	0	1	1	1	1	1	1	1	1	1	1	1
4	47069	łódzkie	RTE	16.05.2014	IVb (3)	2	CC2	SL2	CT4380	1	1	1	1	1	0	0	0	0	0	0	0	0	1	1	1	1	1	1	1	0	1	1	1	0	1	1	0	0	1	1	1	1	1	1	1	1	1	1	1
5	47070	łódzkie	RTE	09.07.2014	IVb (2)	1	CC1	SL1	CT322	1	1	1	1	1	1	1	1	1	1	1	1	1	1	1	1	1	1	1	1	0	1	1	1	0	1	1	0	0	1	1	1	1	1	1	1	1	1	1	1
6	47071	łódzkie	RTE	15.07.2014	IVb (2)	1	CC1	SL1	CT322	1	1	1	1	1	1	1	1	1	1	1	1	1	1	1	1	1	1	1	1	0	1	1	1	0	1	1	0	0	1	1	1	1	1	1	1	1	1	1	1
7	47072	łódzkie	RTE	17.07.2014	IVb (3)	2	CC2	SL2	CT4382	1	1	1	1	1	0	0	0	0	0	0	0	0	1	1	1	1	1	1	1	0	1	1	1	0	1	1	0	0	1	1	1	1	1	1	1	1	1	1	1
8	47073	łódzkie	RTE	11.08.2014	IVb (2)	1	CC1	SL1	CT5260	1	1	1	1	1	1	1	1	1	1	1	1	1	1	1	1	1	1	1	1	0	1	1	1	0	1	1	0	0	1	1	1	1	1	1	1	1	1	1	1
9	47074	łódzkie	RTE	11.08.2014	IVb (2)	1	CC1	SL1	CT5260	1	1	1	1	1	1	1	1	1	1	1	1	1	1	1	1	1	1	1	1	0	1	1	1	0	1	1	0	0	1	1	1	1	1	1	1	1	1	1	1
10	47075	łódzkie	RTE	18.09.2014	IVb (13)	6	CC6	SL6	CT5608	1	1	1	1	1	1	1	1	1	1	1	1	1	1	1	1	1	1	1	1	1	1	1	1	0	1	1	0	0	1	1	1	1	1	1	1	1	1	1	1
11	47076	kujawsko-pomorskie	RTE	25.03.2015	IVb (3)	2	CC2	SL2	CT7743	1	1	1	1	1	0	0	0	0	0	0	0	0	1	1	1	1	1	1	1	0	1	1	1	0	1	1	0	0	1	1	1	1	1	1	1	1	1	1	1
12	47077	wielkopolskie	RTE	22.04.2015	IVb (3)	2	CC2	SL2	CT5259	1	1	1	1	1	0	0	0	0	0	0	0	0	1	1	1	1	1	1	1	0	1	1	1	0	1	1	0	0	1	1	1	1	1	1	1	1	1	1	1
13	47078	małopolskie	RTE	15.05.2015	IVb (13)	6	CC6	SL6	CT434	1	1	1	1	1	1	1	1	1	1	1	1	1	1	1	1	1	1	1	1	1	1	1	1	0	1	1	0	0	1	1	1	1	1	1	1	1	1	1	1
14	47079	opolskie	RTE	27.05.2015	IVb (3)	2	CC2	SL2	CT7747	1	1	1	1	1	0	0	0	0	0	0	0	0	1	1	1	1	1	1	1	0	1	1	1	0	1	1	0	0	1	1	1	1	1	1	1	1	1	1	1
15	47080	warmińsko-mazurskie	RTE	26.05.2015	IVb (3)	145	CC2	SL2	CT375	1	1	1	1	1	0	0	0	0	0	0	0	0	1	1	1	1	1	1	1	0	1	1	1	0	1	1	0	0	1	1	1	1	1	1	1	1	1	1	1
16	47081	zachodniopomorskie	Raw meat	29.05.2015	IVb (3)	145	CC2	SL2	CT375	1	1	1	1	1	0	0	0	0	0	0	0	0	1	1	1	1	1	1	1	0	1	1	1	0	1	1	0	0	1	1	1	1	1	1	1	1	1	1	1
17	47082	zachodniopomorskie	Raw meat	29.05.2015	IVb (3)	145	CC2	SL2	CT375	1	1	1	1	1	0	0	0	0	0	0	0	0	1	1	1	1	1	1	1	0	1	1	1	0	1	1	0	0	1	1	1	1	1	1	1	1	1	1	1
18	47083	zachodniopomorskie	Raw meat	29.05.2015	IVb (3)	145	CC2	SL2	CT375	1	1	1	1	1	0	0	0	0	0	0	0	0	1	1	1	1	1	1	1	0	1	1	1	0	1	1	0	0	1	1	1	1	1	1	1	1	1	1	1
19	47084	warmińsko-mazurskie	FPE	29.07.2015	IVb (2)	515	CC1	SL1	CT7737	1	1	1	1	1	1	1	1	1	1	1	1	1	1	1	1	1	1	1	1	0	1	1	1	0	1	1	0	0	1	1	1	1	1	1	1	1	1	1	1
20	47085	dolnośląskie	RTE	06.08.2015	IVb (3)	2	CC2	SL2	CT5257	1	1	1	1	1	0	0	0	0	0	0	0	0	1	1	1	1	1	1	1	0	1	1	1	0	1	1	0	0	1	1	1	1	1	1	1	1	1	1	1
21	47086	małopolskie	FPE	08.09.2015	IVb (13)	6	CC6	SL6	CT434	1	1	1	1	1	1	1	1	1	1	1	1	1	1	1	1	1	1	1	1	1	1	1	1	0	1	1	0	0	1	1	1	1	1	1	1	1	1	1	1
22	47087	dolnośląskie	RTE	22.09.2015	IVb (3)	2	CC2	SL2	CT7744	1	1	1	1	1	0	0	0	0	0	0	0	0	1	1	1	1	1	1	1	0	1	1	1	0	1	1	0	0	1	1	1	1	1	1	1	1	1	1	1
23	47088	kujawsko-pomorskie	RTE	16.09.2015	IVb (3)	2	CC2	SL2	CT2416	1	1	1	1	1	0	0	0	0	0	0	0	0	1	1	1	1	1	1	1	0	1	1	1	0	1	1	0	0	1	1	1	1	1	1	1	1	1	1	1
24	47089	podkarpackie	RTE	27.11.2015	IVb (13)	6	CC6	SL6	CT461	1	1	1	1	1	1	1	1	1	1	1	1	1	1	1	1	1	1	1	1	1	1	1	1	0	1	1	0	0	1	1	1	1	1	1	1	1	1	1	1
25	47090	lubuskie	RTE	15.12.2015	IVb (3)	145	CC2	SL2	CT375	1	1	1	1	1	0	0	0	0	0	0	0	0	1	1	1	1	1	1	1	0	1	1	1	0	1	1	0	0	1	1	1	1	1	1	1	1	1	1	1
26	47091	warmińsko-mazurskie	RTE	11.03.2016	IVb (3)	2	CC2	SL2	CT4325	1	1	1	1	1	0	0	0	0	0	0	0	0	1	1	1	1	1	1	1	0	1	1	1	0	1	1	0	0	1	1	1	1	1	1	1	1	1	1	1
27	47092	pomorskie	RTE	03.03.2016	IVb (3)	145	CC2	SL2	CT375	1	1	1	1	1	0	0	0	0	0	0	0	0	1	1	1	1	1	1	1	0	1	1	1	0	1	1	0	0	1	1	1	1	1	1	1	1	1	1	1
28	47093	wielkopolskie	FPE	05.04.2016	IVb (3)	2	CC2	SL2	CT7736	1	1	1	1	1	0	0	0	0	0	0	0	0	1	1	1	1	1	1	1	0	1	1	1	0	1	1	0	0	1	1	1	1	1	1	1	1	1	1	1
29	47094	małopolskie	RTE	13.04.2016	IVb (3)	2	CC2	SL2	CT4382	1	1	1	1	1	0	0	0	0	0	0	0	0	1	1	1	1	1	1	1	0	1	1	1	0	1	1	0	0	1	1	1	1	1	1	1	1	1	1	1
30	47095	małopolskie	RTE	25.04.2016	IVb (3)	2	CC2	SL2	CT4382	1	1	1	1	1	0	0	0	0	0	0	0	0	1	1	1	1	1	1	1	0	1	1	1	0	1	1	0	0	1	1	1	1	1	1	1	1	1	1	1
31	47096	świętokrzyskie	RTE	28.04.2016	IVb (3)	145	CC2	SL2	CT375	1	1	1	1	1	0	0	0	0	0	0	0	0	1	1	1	1	1	1	1	0	1	1	1	0	1	1	0	0	1	1	1	1	1	1	1	1	1	1	1
32	47097	świętokrzyskie	RTE	05.05.2016	IVb (3)	145	CC2	SL2	CT375	1	1	1	1	1	0	0	0	0	0	0	0	0	1	1	1	1	1	1	1	0	1	1	1	0	1	1	0	0	1	1	1	1	1	1	1	1	1	1	1
33	47098	wielkopolskie	RTE	21.04.2016	IVb (2)	1	CC1	SL1	CT4326	1	1	1	1	1	1	1	1	1	1	1	1	1	1	1	1	1	1	1	1	0	1	1	1	0	1	1	0	0	1	1	1	1	1	1	1	1	1	1	1
34	47099	podkarpackie	RTE	10.05.2016	IVb (13)	6	CC6	SL6	CT461	1	1	1	1	1	1	1	1	1	1	1	1	1	1	1	1	1	1	1	1	1	1	1	1	0	1	1	0	0	1	1	1	1	1	1	1	1	1	1	1
35	47100	podkarpackie	RTE	10.05.2016	IVb (2)	1	CC1	SL1	CT322	1	1	1	1	1	1	1	1	1	1	1	1	1	1	1	1	1	1	1	1	0	1	1	1	0	1	1	0	0	1	1	1	1	1	1	1	1	1	1	1
36	47101	świętokrzyskie	RTE	17.05.2016	IVb (3)	145	CC2	SL2	CT375	1	1	1	1	1	0	0	0	0	0	0	0	0	1	1	1	1	1	1	1	0	1	1	1	0	1	1	0	0	1	1	1	1	1	1	1	1	1	1	1
37	47102	świętokrzyskie	RTE	31.05.2016	IVb (3)	145	CC2	SL2	CT375	1	1	1	1	1	0	0	0	0	0	0	0	0	1	1	1	1	1	1	1	0	1	1	1	0	1	1	0	0	1	1	1	1	1	1	1	1	1	1	1
38	47103	kujawsko-pomorskie	RTE	01.06.2016	IVb (3)	145	CC2	SL2	CT375	1	1	1	1	1	0	0	0	0	0	0	0	0	1	1	1	1	1	1	1	0	1	1	1	0	1	1	0	0	1	1	1	1	1	1	1	1	1	1	1
39	47104	opolskie	FPE	30.05.2016	IVb (3)	2	CC2	SL2	CT4325	1	1	1	1	1	0	0	0	0	0	0	0	0	1	1	1	1	1	1	1	0	1	1	1	0	1	1	0	0	1	1	1	1	1	1	1	1	1	1	1
40	47105	zachodniopomorskie	Raw meat	20.06.2016	IVb (3)	145	CC2	SL2	CT375	1	1	1	1	1	0	0	0	0	0	0	0	0	1	1	1	1	1	1	1	0	1	1	1	0	1	1	0	0	1	1	1	1	1	1	1	1	1	1	1
41	47106	lubuskie	Raw meat	22.06.2016	IVb (3)	145	CC2	SL2	CT375	1	1	1	1	1	0	0	0	0	0	0	0	0	1	1	1	1	1	1	1	0	1	1	1	0	1	1	0	0	1	1	1	1	1	1	1	1	1	1	1
42	47107	kujawsko-pomorskie	FPE	24.06.2016	IVb (3)	145	CC2	SL2	CT375	1	1	1	1	1	0	0	0	0	0	0	0	0	1	1	1	1	1	1	1	0	1	1	1	0	1	1	0	0	1	1	1	1	1	1	1	1	1	1	1
43	47108	wielkopolskie	Raw meat	04.10.2016	IVb (3)	2	CC2	SL2	CT2416	1	1	1	1	1	0	0	0	0	0	0	0	0	1	1	1	1	1	1	1	0	1	1	1	0	1	1	0	0	1	1	1	1	1	1	1	1	1	1	1
44	47109	wielkopolskie	Raw meat	29.09.2016	IVb (13)	6	CC6	SL6	CT7738	1	1	1	1	1	1	1	1	1	1	1	1	1	1	1	1	1	1	1	1	1	1	1	1	0	1	1	0	0	1	1	1	1	1	1	1	1	1	1	1
45	47110	małopolskie	FPE	04.11.2016	IVb (13)	6	CC6	SL6	CT434	1	1	1	1	1	1	1	1	1	1	1	1	1	1	1	1	1	1	1	1	1	1	1	1	0	1	1	0	0	1	1	1	1	1	1	1	1	1	1	1
46	47111	zachodniopomorskie	Raw meat	11.01.2016	IVb (3)	145	CC2	SL2	CT375	1	1	1	1	1	0	0	0	0	0	0	0	0	1	1	1	1	1	1	1	0	1	1	1	0	1	1	0	0	1	1	1	1	1	1	1	1	1	1	1
47	47112	zachodniopomorskie	Raw meat	25.01.2017	IVb (3)	145	CC2	SL2	CT375	1	1	1	1	1	0	0	0	0	0	0	0	0	1	1	1	1	1	1	1	0	1	1	1	0	1	1	0	0	1	1	1	1	1	1	1	1	1	1	1
48	47113	zachodniopomorskie	Raw meat	22.05.2017	IVb (3)	145	CC2	SL2	CT375	1	1	1	1	1	0	0	0	0	0	0	0	0	1	1	1	1	1	1	1	0	1	1	1	0	1	1	0	0	1	1	1	1	1	1	1	1	1	1	1
49	47114	zachodniopomorskie	Raw meat	21.06.2017	IVb (3)	145	CC2	SL2	CT375	1	1	1	1	1	0	0	0	0	0	0	0	0	1	1	1	1	1	1	1	0	1	1	1	0	1	1	0	0	1	1	1	1	1	1	1	1	1	1	1
50	47115	zachodniopomorskie	Raw meat	28.06.2017	IVb (3)	145	CC2	SL2	CT375	1	1	1	1	1	0	0	0	0	0	0	0	0	1	1	1	1	1	1	1	0	1	1	1	0	1	1	0	0	1	1	1	1	1	1	1	1	1	1	1
51	47116	zachodniopomorskie	Raw meat	16.08.2017	IVb (3)	145	CC2	SL2	CT375	1	1	1	1	1	0	0	0	0	0	0	0	0	1	1	1	1	1	1	1	0	1	1	1	0	1	1	0	0	1	1	1	1	1	1	1	1	1	1	1
52	47118	zachodniopomorskie	Raw meat	29.09.2017	IVb (3)	145	CC2	SL2	CT375	1	1	1	1	1	0	0	0	0	0	0	0	0	1	1	1	1	1	1	1	0	1	1	1	0	1	1	0	0	1	1	1	1	1	1	1	1	1	1	1
53	47119	zachodniopomorskie	Raw meat	30.11.2017	IVb (3)	145	CC2	SL2	CT375	1	1	1	1	1	0	0	0	0	0	0	0	0	1	1	1	1	1	1	1	0	1	1	1	0	1	1	0	0	1	1	1	1	1	1	1	1	1	1	1
54	47120	dolnośląskie	Raw meat	12.10.2017	IVb (3)	145	CC2	SL2	CT375	1	1	1	1	1	0	0	0	0	0	0	0	0	1	1	1	1	1	1	1	0	1	1	1	0	1	1	0	0	1	1	1	1	1	1	1	1	1	1	1
55	47121	podkarpackie	Raw meat	08.05.2018	IVb (2)	1	CC1	SL1	CT7733	1	1	1	1	1	1	1	1	1	1	1	1	1	1	1	1	1	1	1	1	0	1	1	1	0	1	1	0	0	1	1	1	1	1	1	1	1	1	1	1
56	47122	podkarpackie	Raw meat	14.06.2018	IVb (2)	1	CC1	SL1	CT322	1	1	1	1	1	1	1	1	1	1	1	1	1	1	1	1	1	1	1	1	0	1	1	1	0	1	1	0	0	1	1	1	1	1	1	1	1	1	1	1
57	47123	wielkopolskie	FPE	18.05.2018	IVb (13)	6	CC6	SL6	CT4402	1	1	1	1	1	1	1	1	1	1	1	1	1	1	1	1	1	1	1	1	1	1	1	1	0	1	1	0	0	1	1	1	1	1	1	1	1	1	1	1
58	47124	dolnośląskie	Raw meat	22.08.2018	IVb (3)	145	CC2	SL2	CT375	1	1	1	1	1	0	0	0	0	0	0	0	0	1	1	1	1	1	1	1	0	1	1	1	0	1	1	0	0	1	1	1	1	1	1	1	1	1	1	1
59	47125	śląskie	Raw meat	16.10.2018	IVb (3)	145	CC2	SL2	CT375	1	1	1	1	1	0	0	0	0	0	0	0	0	1	1	1	1	1	1	1	0	1	1	1	0	1	1	0	0	1	1	1	1	1	1	1	1	1	1	1
60	47126	wielkopolskie	FPE	23.11.2018	IVb (3)	2	CC2	SL2	CT2416	1	1	1	1	1	0	0	0	0	0	0	0	0	1	1	1	1	1	1	1	0	1	1	1	0	1	1	0	0	1	1	1	1	1	1	1	1	1	1	1
61	47127	małopolskie	Raw meat	12.12.2018	IVb (13)	6	CC6	SL6	CT5306	1	1	1	1	1	1	1	1	1	1	1	1	1	1	1	1	1	1	1	1	1	1	1	1	0	1	1	0	0	1	1	1	1	1	1	1	1	1	1	1
62	47128	łódzkie	RTE	01.10.2014	IVb (3)	2	CC2	SL2	CT2416	1	1	1	1	1	0	0	0	0	0	0	0	0	1	1	1	1	1	1	1	0	1	1	1	0	1	1	0	0	1	1	1	1	1	1	1	1	1	1	1
63	47129	warmińsko-mazurskie	RTE	26.02.2015	IVb (3)	2	CC2	SL2	CT7746	1	1	1	1	1	0	0	0	0	0	0	0	0	1	1	1	1	1	1	1	0	1	1	1	0	1	1	0	0	1	1	1	1	1	1	1	1	1	1	1
64	47130	małopolskie	RTE	12.06.2015	IVb (3)	2	CC2	SL2	CT7734	1	1	1	1	1	0	0	0	0	0	0	0	0	1	1	1	1	1	1	1	0	1	1	1	0	1	1	0	0	1	1	1	1	1	1	1	1	1	1	1
65	47131	małopolskie	RTE	21.09.2015	IVb (3)	2	CC2	SL2	CT7742	1	1	1	1	1	0	0	0	0	0	0	0	0	1	1	1	1	1	1	1	0	1	1	1	0	1	1	0	0	1	1	1	1	1	1	1	1	1	1	1
66	47132	małopolskie	RTE	16.12.2015	IVb (3)	2	CC2	SL2	CT4325	1	1	1	1	1	0	0	0	0	0	0	0	0	1	1	1	1	1	1	1	0	1	1	1	0	1	1	0	0	1	1	1	1	1	1	1	1	1	1	1
67	47133	warmińsko-mazurskie	RTE	02.06.2016	IVb (3)	2	CC2	SL2	CT7741	1	1	1	1	1	0	0	0	0	0	0	0	0	1	1	1	1	1	1	1	0	1	1	1	0	1	1	0	0	1	1	1	1	1	1	1	1	1	1	1
68	47134	wielkopolskie	RTE	09.06.2016	IVb (3)	2	CC2	SL2	CT4325	1	1	1	1	1	0	0	0	0	0	0	0	0	1	1	1	1	1	1	1	0	1	1	1	0	1	1	0	0	1	1	1	1	1	1	1	1	1	1	1
69	47135	wielkopolskie	RTE	21.06.2016	IVb (3)	2	CC2	SL2	CT4325	1	1	1	1	1	0	0	0	0	0	0	0	0	1	1	1	1	1	1	1	0	1	1	1	0	1	1	0	0	1	1	1	1	1	1	1	1	1	1	1
70	47136	wielkopolskie	RTE	01.07.2016	IVb (3)	2	CC2	SL2	CT2416	1	1	1	1	1	0	0	0	0	0	0	0	0	1	1	1	1	1	1	1	0	1	1	1	0	1	1	0	0	1	1	1	1	1	1	1	1	1	1	1
71	47137	małopolskie	RTE	15.07.2016	IVb (3)	2	CC2	SL2	CT4382	1	1	1	1	1	0	0	0	0	0	0	0	0	1	1	1	1	1	1	1	0	1	1	1	0	1	1	0	0	1	1	1	1	1	1	1	1	1	1	1
72	47138	małopolskie	RTE	28.09.2016	IVb (3)	2	CC2	SL2	CT4380	1	1	1	1	1	0	0	0	0	0	0	0	0	1	1	1	1	1	1	1	0	1	1	1	0	1	1	0	0	1	1	1	1	1	1	1	1	1	1	1
73	47139	warmińsko-mazurskie	RTE	14.10.2016	IVb (3)	2	CC2	SL2	CT4380	1	1	1	1	1	0	0	0	0	0	0	0	0	1	1	1	1	1	1	1	0	1	1	1	0	1	1	0	0	1	1	1	1	1	1	1	1	1	1	1
74	47140	wielkopolskie	RTE	05.12.2016	IVb (3)	145	CC2	SL2	CT375	1	1	1	1	1	0	0	0	0	0	0	0	0	1	1	1	1	1	1	1	0	1	1	1	0	1	1	0	0	1	1	1	1	1	1	1	1	1	1	1
75	47141	warmińsko-mazurskie	RTE	13.12.2017	IVb (3)	2	CC2	SL2	CT4325	1	1	1	1	1	0	0	0	0	0	0	0	0	1	1	1	1	1	1	1	0	1	1	1	0	1	1	0	0	1	1	1	1	1	1	1	1	1	1	1
76	47142	małopolskie	RTE	04.04.2017	IVb (3)	2	CC2	SL2	CT4380	1	1	1	1	1	0	0	0	0	0	0	0	0	1	1	1	1	1	1	1	0	1	1	1	0	1	1	0	0	1	1	1	1	1	1	1	1	1	1	1
77	47143	małopolskie	RTE	10.04.2017	IVb (3)	2	CC2	SL2	CT4380	1	1	1	1	1	0	0	0	0	0	0	0	0	1	1	1	1	1	1	1	0	1	1	1	0	1	1	0	0	1	1	1	1	1	1	1	1	1	1	1
78	47144	dolnośląskie	RTE	22.03.2017	IVb (3)	2	CC2	SL2	CT4380	1	1	1	1	1	0	0	0	0	0	0	0	0	1	1	1	1	1	1	1	0	1	1	1	0	1	1	0	0	1	1	1	1	1	1	1	1	1	1	1
79	47145	świętokrzyskie	RTE	12.10.2017	IVb (3)	2	CC2	SL2	CT7740	1	1	1	1	1	0	0	0	0	0	0	0	0	1	1	1	1	1	1	1	0	1	1	1	0	1	1	0	0	1	1	1	1	1	1	1	1	1	1	1
80	47146	małopolskie	RTE	02.10.2017	IVb (3)	2	CC2	SL2	CT4325	1	1	1	1	1	0	0	0	0	0	0	0	0	1	1	1	1	1	1	1	0	1	1	1	0	1	1	0	0	1	1	1	1	1	1	1	1	1	1	1
81	47147	małopolskie	RTE	10.10.2017	IVb (3)	2	CC2	SL2	CT4325	1	1	1	1	1	0	0	0	0	0	0	0	0	1	1	1	1	1	1	1	0	1	1	1	0	1	1	0	0	1	1	1	1	1	1	1	1	1	1	1
82	47148	małopolskie	RTE	27.02.2018	IVb (3)	2	CC2	SL2	CT4325	1	1	1	1	1	0	0	0	0	0	0	0	0	1	1	1	1	1	1	1	0	1	1	1	0	1	1	0	0	1	1	1	1	1	1	1	1	1	1	1
83	47149	dolnośląskie	RTE	20.03.2018	IVb (3)	2	CC2	SL2	CT4380	1	1	1	1	1	0	0	0	0	0	0	0	0	1	1	1	1	1	1	1	0	1	1	1	0	1	1	0	0	1	1	1	1	1	1	1	1	1	1	1
84	47150	wielkopolskie	RTE	22.03.2018	IVb (3)	2	CC2	SL2	CT4380	1	1	1	1	1	0	0	0	0	0	0	0	0	1	1	1	1	1	1	1	0	1	1	1	0	1	1	0	0	1	1	1	1	1	1	1	1	1	1	1
85	47151	opolskie	RTE	20.06.2018	IVb (3)	2	CC2	SL2	CT7748	1	1	1	1	1	0	0	0	0	0	0	0	0	1	1	1	1	1	1	1	0	1	1	1	0	1	1	0	0	1	1	1	1	1	1	1	1	1	1	1
86	47152	dolnośląskie	RTE	15.11.2018	IVb (3)	2	CC2	SL2	CT4380	1	1	1	1	1	0	0	0	0	0	0	0	0	1	1	1	1	1	1	1	0	1	1	1	0	1	1	0	0	1	1	1	1	1	1	1	1	1	1	1
87	47153	lubuskie	RTE	18.09.2018	IVb (3)	2	CC2	SL2	CT7735	1	1	1	1	1	0	0	0	0	0	0	0	0	1	1	1	1	1	1	1	0	1	1	1	0	1	1	0	0	1	1	1	1	1	1	1	1	1	1	1
88	47154	wielkopolskie	RTE	12.12.2018	IVb (3)	2	CC2	SL2	CT4325	1	1	1	1	1	0	0	0	0	0	0	0	0	1	1	1	1	1	1	1	0	1	1	1	0	1	1	0	0	1	1	1	1	1	1	1	1	1	1	1
89	47155	wielkopolskie	RTE	09.05.2019	IVb (3)	2	CC2	SL2	CT2416	1	1	1	1	1	0	0	0	0	0	0	0	0	1	1	1	1	1	1	1	0	1	1	1	0	1	1	0	0	1	1	1	1	1	1	1	1	1	1	1
90	47156	podkarpackie	RTE	27.05.2019	IVb (3)	2	CC2	SL2	CT7745	1	1	1	1	1	0	0	0	0	0	0	0	0	1	1	1	1	1	1	1	0	1	1	1	0	1	1	0	0	1	1	1	1	1	1	1	1	1	1	1
91	47157	dolnośląskie	RTE	26.06.2019	IVb (3)	2	CC2	SL2	CT7739	1	1	1	1	1	0	0	0	0	0	0	0	0	1	1	1	1	1	1	1	0	1	1	1	0	1	1	0	0	1	1	1	1	1	1	1	1	1	1	1
1, Presence of the gene
0, Absence of the gene
Abbreviations: RTE- Ready-To-Eat food of animal origin, FPE - Food Production Environments (meat processing plants)
[truncated: 181 more columns]
